# Supplementary material
Source: publisher figshare collection journal article supplement (https://karger.figshare.com/ndownloader/files/18532973)
Supplement: Supplementary file 1 [file 18532973]

Supplemental Table 1.

Characteristics of embolic stroke of undetermined source patients with large patent foramen ovale.

|  |  | n=27 |
| --- | --- | --- |
|  | Age, y | 67 (54-75) |
|  | Sex, M/F | 18/9 |
|  | Vascular risk factors |  |
|  | Hypertension | 17 (63) |
|  | Diabetes | 3 (11) |
|  | Hyperlipidemia | 10 (37) |
|  | Smoking | 8 (30) |
|  | Past history |  |
|  | Ischemic heart disease | 0 (0) |
|  | Ischemic stroke | 4 (15) |
|  | Initial NIHSS score | 1 (0-5) |
|  | Initial DWI lesion volume | 0.6 (0-2.15) |
|  | Transthoracic echocardiography |  |
|  | Left atrial diameter, mm | 33 (29-41) |
|  | Ejection fraction < 40% | 0 (0) |
|  | E/e’ | 9.6 (7.5-11.6) |
|  | Mitral annular calcification | 0 (0) |
|  | Mitral regurgitation | 9 (33) |
|  | Aortic stenosis | 0 (0) |
|  | Aortic regurgitation | 9 (33) |
|  | Left ventricular hypertrophy | 2 (7) |
|  | Transesophageal echocardiography |  |
|  | Aortic arch plaque | 6 (22) |
|  | Left atrial appendage flow velocity, cm/s | 54 (44-68) |
|  | Laboratory findings |  |
|  | C-reactive protein, mg/dL | 0.08 (0.03-0.18) |
|  | BNP, pg/mL | 25.0 (9.0-44.9) |
|  | D-dimer, μg/mL | 0.8 (0.5-1.4) |

M, male; F, female; NIHSS, National Institute of Health stroke scale; DWI, diffusion-weighted imaging; BNP, brain natriuretic peptide; E, peak early transmitral filling velocities during early diastole; e’, peak velocities of septal mitral annulus on the tissue Doppler image.
